# Supplementary material for: Microstructure parameter-dependent non-collinear magnetic structures in scandium-doped M-type hexaferrite nanocrystals
Source: Royal Society of Chemistry journal article supplement (doi:10.1039/d4nr01642d), 2024-01-01
Supplement: d4nr01642d2.pdf [file d4nr01642d2.pdf]

## ***Supporting Information for***

### **Microstructure Parameters-Dependent Non-Collinear Magnetic Structure in Scandium-Doped M-Type Hexaferrite Nanocrystal**

Qiankun Qin<sup>1</sup>, Afei Ding<sup>1</sup>, WL Qubie<sup>1</sup>, Pushpendra Kumar<sup>2</sup>, Shixin Hu<sup>1</sup>, Tianyang Yao<sup>1</sup>, Junli Zhang<sup>1\*</sup>

<sup>1</sup>School of Physical Science and Technology, Lanzhou University, Lanzhou 730000, P. R. China

<sup>2</sup>School of Physical Sciences, Jawaharlal Nehru University, New Delhi, 110067, India

\* Corresponding authors: E-mail: [zhangjl@lzu.edu.cn](mailto:zhangjl@lzu.edu.cn) (Junli Zhang)

## Morphology and crystal Structure

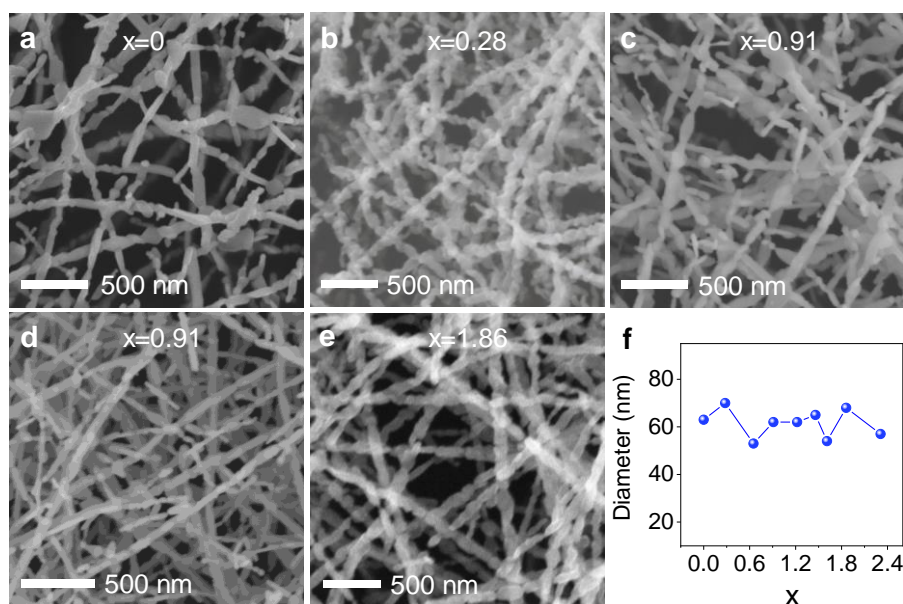

**Figure S1.** Morphology of  $\text{BaFe}_{12-x}\text{Sc}_x\text{O}_{19}$  ( $0 \leq X \leq 3.47$ ) nanofibers. (a-e) SEM images of  $\text{BaFe}_{12-x}\text{Sc}_x\text{O}_{19}$  nanofibers with  $x=0, 0.28, 0.91, 1.61, 1.86$  respectively. (f) Line graph of the average diameter acquired using the Nano Measure software.

$\text{BaFe}_{12-x}\text{Sc}_x\text{O}_{19}$  nanofibers with different Sc concentration nanofibers were systematically studied. Figure S1a-e shows representative SEM images of  $\text{BaFe}_{12-x}\text{Sc}_x\text{O}_{19}$  ( $x=0, 0.28, 0.65, 0.91, 1.22, 1.46, 1.61, 1.86, 2.31, 3.04$ ). It is clearly seen that nanofibers consist of single nanoparticles arranged in a chain-like manner along the axial direction. The average diameter is approximately 60 nm as shown in Figure S1f. Note that the chemical composition of Ba: Fe: Sc of  $\text{BaFe}_{12-x}\text{Sc}_x\text{O}_{19}$  nanofibers is confirmed by the EDX spectra (Figure S2), and the Fe concentration of all samples was demonstrated to deviate from the nominal composition of raw materials.

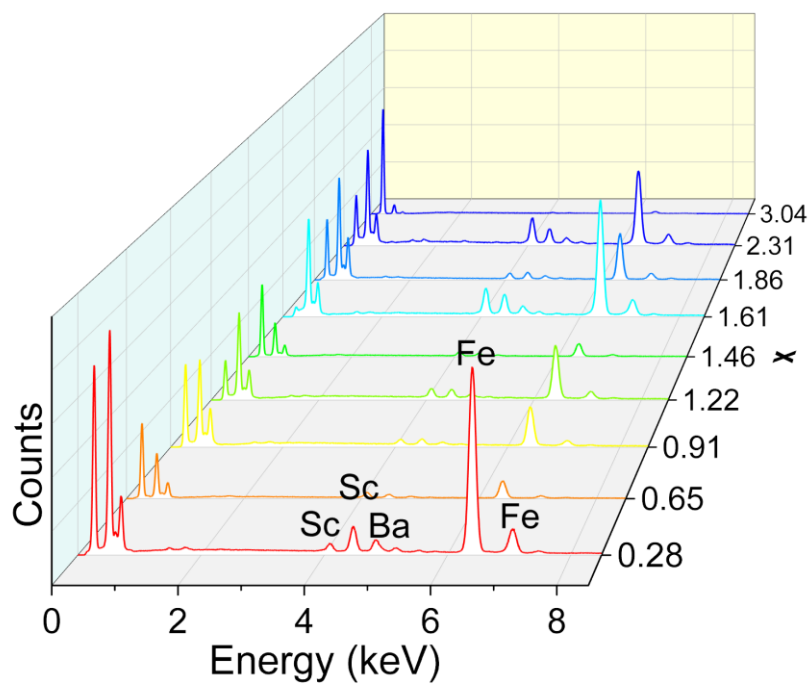

**Figure S2.** EDX patterns of prepared BaFe<sub>12-x</sub>Sc<sub>x</sub>O<sub>19</sub> ( $0 \leq x \leq 3.04$ ) nanofibers.

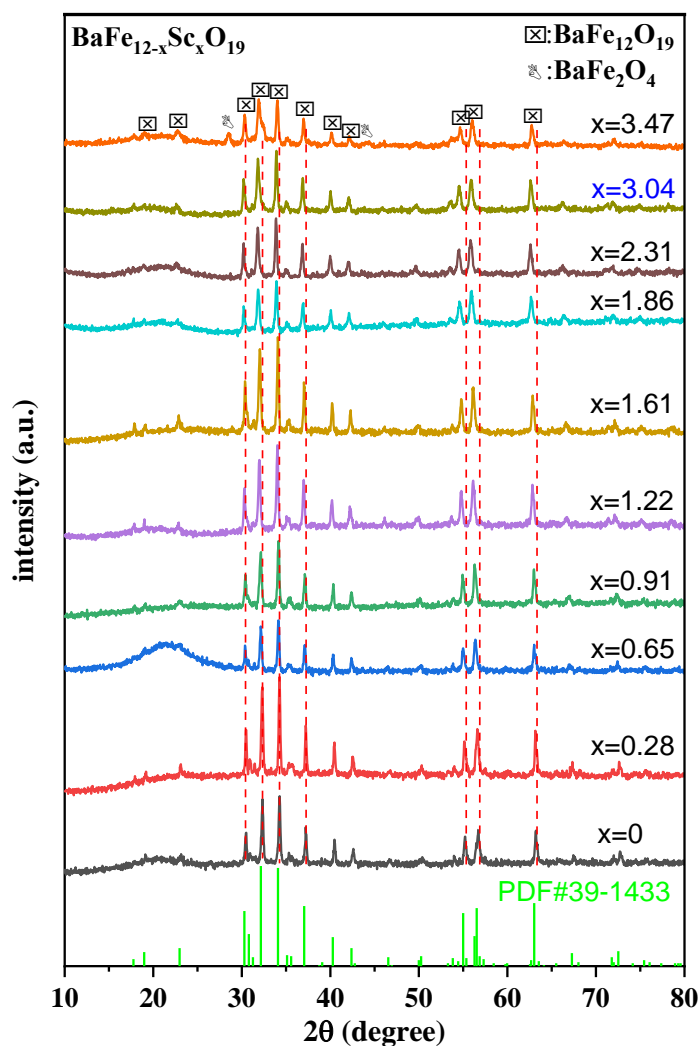

**Figure S3.** Room temperature X-ray diffraction patterns of  $\text{BaFe}_{12-x}\text{Sc}_x\text{O}_{19}$  ( $0 \leq x \leq 3.47$ ) nanofibers.

The XRD pattern of the  $\text{BaFe}_{12-x}\text{Sc}_x\text{O}_{19}$  nanofibers indicates a *hcp* structure with *P63/mmc* space group, which is well maintained with increasing Sc content up to 3.04 (Figure S3). The diffraction peaks characteristic of M-type barium ferrite exhibits a gradual leftward shift with increasing Sc concentration, signifying an expansion of the lattice. This shift is attributed to the larger ionic radius of  $\text{Sc}^{3+}$  compared to  $\text{Fe}^{3+}$ . As the value of  $x$  increments from 0 to 3.04, this shift is approximately  $0.4^\circ$  to the left. Note that, the  $\text{BaFe}_2\text{O}_4$  impurity spinel phase was found as doping content increased to 3.47, indicating 3.04 is an upper limit for the Sc concentration. This can be attributed to hexagonal lattice expansion and chemical potential variation of the *hcp* structure.

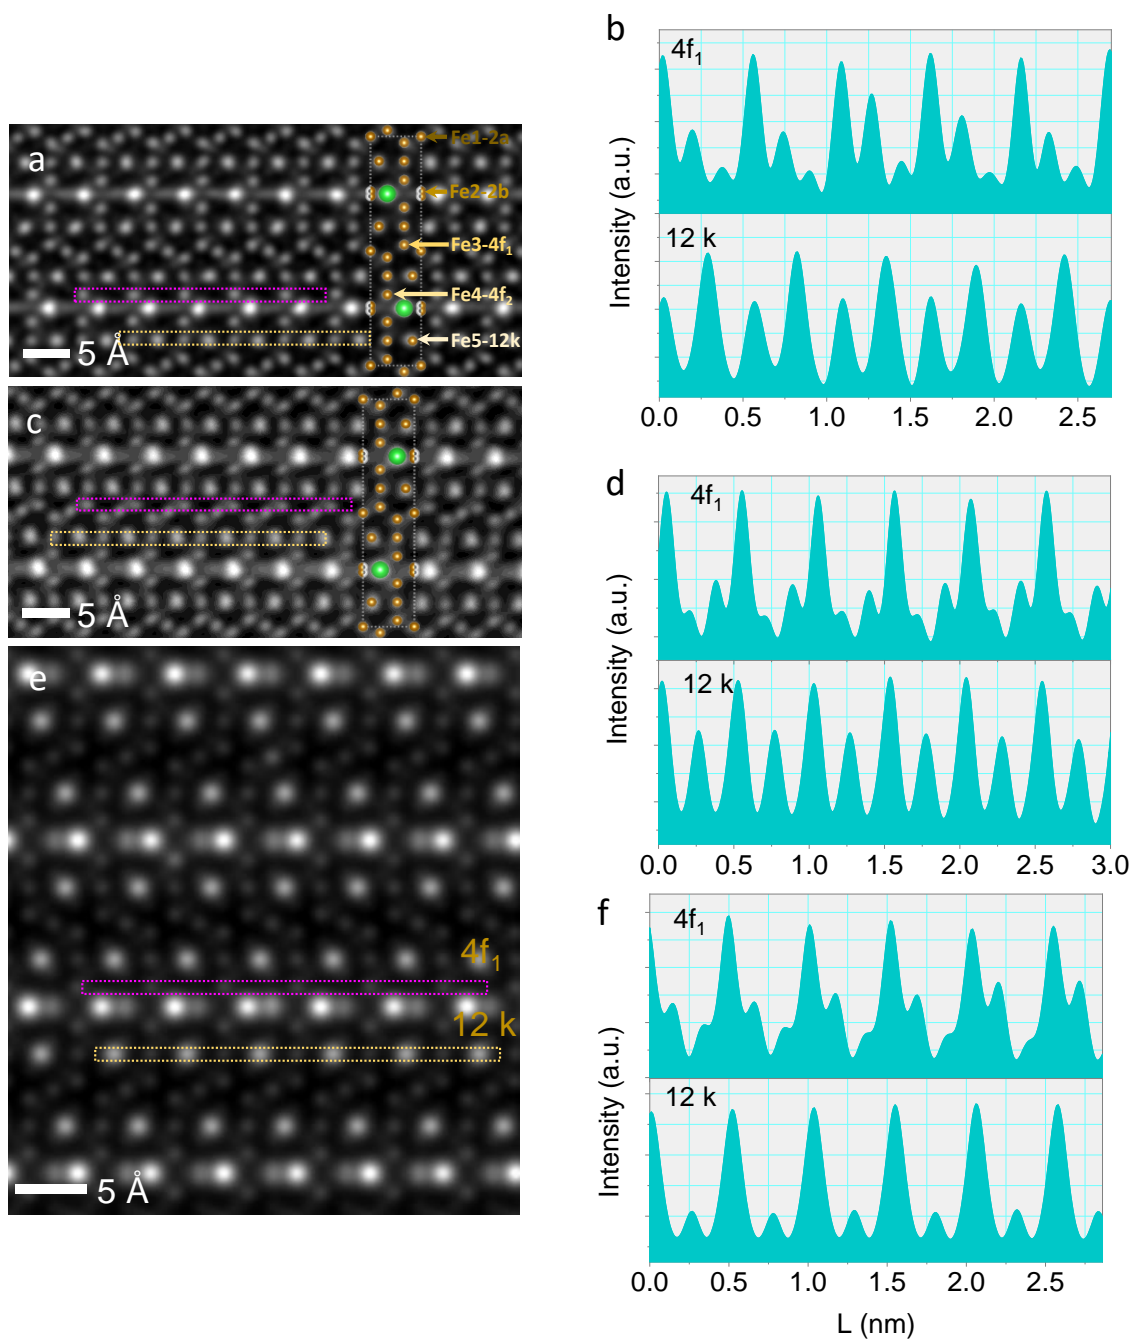

**Figure S4.** (a)-(d) Locally enlarge HAADF-TEM image and ABF-TEM image, and line intensity profiles for the atomic columns respectively at  $4f_1$  and  $12k$  sites  $\text{BaFe}_{12}\text{O}_{19}$  of  $\text{BaFe}_{11.39}\text{Sc}_{1.61}\text{O}_{19}$ . (e)-(f) Theoretical high-resolution HAADF-TEM images along the  $[110]$  zone axis of the  $\text{BaFe}_{12-x}\text{Sc}_x\text{O}_{19}$ , and line intensity profiles for the atomic columns at  $4f_1$  and  $12k$  sites.

**Table S1.** Detailed refinement parameters including the substituted amount of Fe<sup>3+</sup> by Sc<sup>3+</sup> at different sites ( $2a$ ,  $4f_2$ ,  $2b$ ), and lattice-parameter values ( $a$ ,  $c$ , and  $c/a$ ) with different Sc-substitution amounts.

| $x$  | $2a$ | $2b$ | $4f_2$ | $a$ (Å) | $c$ (Å) | $c/a$ |
|------|------|------|--------|---------|---------|-------|
| 0    | 0    | 0    | 0      | 5.892   | 23.204  | 3.938 |
| 0.28 | 0.21 | 0    | 0.07   | 5.901   | 23.279  | 3.945 |
| 0.91 | 0.40 | 0.12 | 0.39   | 5.917   | 23.439  | 3.961 |
| 1.46 | 0.46 | 0.27 | 0.73   | 5.927   | 23.532  | 3.971 |
| 1.61 | 0.48 | 0.32 | 0.81   | 5.931   | 23.561  | 3.973 |
| 1.86 | 0.52 | 0.98 | 0.36   | 5.944   | 23.651  | 3.979 |

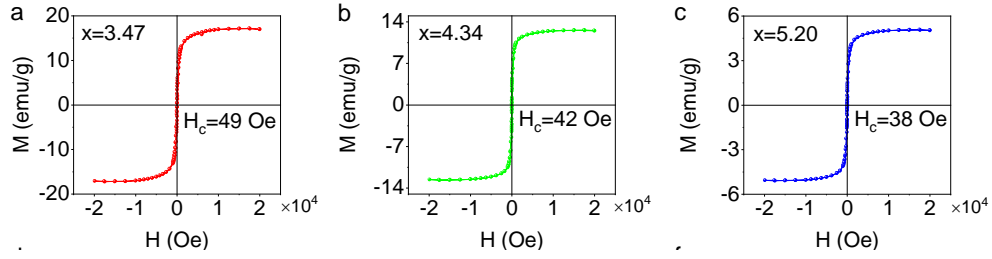

**Figure S5.** Room temperature hysteresis loops of  $\text{BaFe}_{12-x}\text{Sc}_x\text{O}_{19}$  ( $3.47 \leq x \leq 12$ ) nanofibers.

The presence of  $\text{BaFe}_2\text{O}_4$  and other impurity phases is likely to attenuate the saturation magnetization and coercivity of our specimens when  $x$  further increased from 3.47 to 5.20, as indicated by Figure S5.

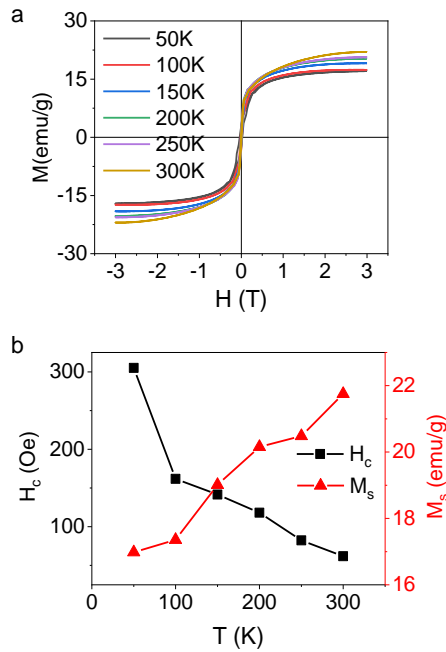

**Figure S6.** (a) Hysteresis loops of  $\text{BaFe}_{12-x}\text{Sc}_x\text{O}_{19}$  with  $x=3.04$  (b) Temperature dependence of coercivity and saturation magnetization.

**Table S2.** Detailed refinement parameters of BaFe<sub>12</sub>O<sub>19</sub>.

| Sublattice<br>(mm/s)  | Coordination | B <sub>hf</sub> (T) | IS (mm/s) | QS      |
|-----------------------|--------------|---------------------|-----------|---------|
| 4f <sub>2</sub> (Fe4) | octahedral   | 51.0(1)             | 0.34(1)   | 0.10(2) |
| 2a (Fe1)              | octahedral   | 48.7(2)             | 0.27(3)   | 0.33(5) |
| 4f <sub>1</sub> (Fe3) | tetrahedral  | 48.2(4)             | 0.31(5)   | 0.03(9) |
| 12k (Fe5)             | octahedral   | 41.5(4)             | 0.30(1)   | 0.41(1) |
| 2b (Fe2)              | bi-pyramidal | 38.7(3)             | 0.48(4)   | 2.15(7) |

**Table S3.** Detailed refinement parameters of BaFe<sub>12-x</sub>Sc<sub>x</sub>O<sub>19</sub> with  $x=1.61$  and  $1.86$ .

| $x$ value | B <sub>hf</sub> (T) | IS (mm/s) | QS (mm/s) |
|-----------|---------------------|-----------|-----------|
| 1.61      | 29.1(0)             | 0.37 (0)  | 0.18(8)   |
| 1.86      | 23.7(9)             | 0.39(3)   | 0.16(3)   |
